# **Benchmarking Risk Predictions and Uncertainties in the NSCR Model of GCR Cancer Risks with Revised Low LET Risk Coefficients**

Francis A. Cucinotta<sup>1,\*</sup>, Eliedonna Cacao<sup>1</sup>,  
Myung-Hee Y. Kim<sup>2</sup>, Premkumar B. Saganti<sup>2</sup>

<sup>1</sup>Department of Health Physics and Diagnostic Sciences, University of Nevada, Las Vegas, NV, United States of America

<sup>2</sup>Physics Department, Prairie View A&M University, Prairie View TX, United States of America

\*Correspondence author

E-mail: [francis.cucinotta@unlv.edu](mailto:francis.cucinotta@unlv.edu)

## Abstract

We report on the contributions of model factors that appear in fatal cancer risk projection models to the overall uncertainty in cancer risks predictions for exposures to galactic cosmic ray (GCR) in deep space. Annual GCR exposures to astronauts at solar minimum are considered. Uncertainties in low LET risk coefficients, dose and dose-rate modifiers, quality factors (QFs), space radiation organ doses, non-targeted effects (NTE) and increased tumor lethality at high LET compared to low LET radiation are considered. For the low LET reference radiation parameters we use a revised assessment of excess relative risk (ERR) and excess additive risk (EAR) for radiation induced cancers in the Life-Span Studies (LSS) of the Atomic bomb survivors that was recently reported, and also consider ERR estimates for males from the International Study of Nuclear Workers (INWORKS). For 45-y old females at mission age the risk of exposure induced death (REID) per year and 95% confidence intervals is predicted as 1.6% [0.71, 1.63] without QF uncertainties and 1.64% [0.69, 4.06] with QF uncertainties. However, fatal risk predictions increase to 5.83% [2.56, 9.7] with non-targeted effects. For males a comparison application to GCR using LSS or INWORKS lead to predictions of 1.24% [0.58, 3.14] and 2.45% [1.23, 5.9] without NTEs. The major conclusion of our report is that high LET risk prediction uncertainties due to QFs parameters, NTEs, and possible increase lethality at high LET are dominant contributions to GCR uncertainties and should be the focus of space radiation research.

**Key words:** Galactic cosmic rays (GCR), HZE particles, high LET radiation, space radiation, cancer risk, relative biological effectiveness (RBE), quality factors (QF).

## 1 **1. Introduction**

2           In this paper we benchmark the current uncertainties in estimating cancer risks  
3 from GCR exposures in the NASA Space Cancer Risk Model (NSCR). Because of the  
4 large uncertainties in high charge and energy (HZE) particle radiobiology and the small  
5 population of space workers, distinct methods are used at NASA to implement a  
6 radiation protection program compared to ground-based radiation workers. The basic  
7 approach is derived from recommendations by the National Council on Radiation  
8 Protection and Measurements (NCRP) [1-3], however we have developed an approach  
9 to make a rigorous uncertainty analysis [4-9], which has undergone external review by  
10 the National Research Council (NRC) [10] and NCRP [11].

11           The most recent analysis of GCR risks by the NSCR model [7-9] enjoys a  
12 significant reduction in overall uncertainty compared to our previous ones due to an  
13 improved treatment of the QF and DDREF and their possible correlations. Estimates of  
14 maximum relative biological effectiveness ( $RBE_{max}$ ) defined by the ratio of initial  
15 linear slopes determined at low dose and dose-rate for particles to  $\gamma$ -rays have been used  
16 in radiation protection to assign values of QFs. Values of  $RBE_{max}$  are highly dependent  
17 on the reference radiation used and their responses at low doses and dose-rates. The  
18 large values of  $RBE_{max}$  found in many experiments can be attributed in-part to the  
19 ineffectiveness of low doses or low dose-rates of  $\gamma$ -rays [8,9]. In addition, not all  
20 experiments have used either low dose-rates ( $<0.1$  Gy/hr) or lower doses ( $<0.25$  Gy) of  
21  $\gamma$ -rays thus precluding  $RBE_{max}$  estimates. We have shown that assigning QF based on  
22  $RBE$ 's for acute  $\gamma$ -ray exposures leads to a reduction in risk estimates and uncertainty.

23           The dominant uncertainties found in previous reports were the uncertainties in  
24 the parameters in the quality factor model and several uncertainties related to  
25 breakdown of the conventional risk assessment approach. Here the conventional  
26 approach using QFs only describe quantitative differences between heavy ions and  
27 other high LET radiation compared to a low LET reference radiation, while qualitative  
28 differences may occur. Furthermore because of the absence of epidemiology data for  
29 humans exposed to space radiation, the interpretation of data from experimental models  
30 are limited unless accurate extrapolation methods are developed. Previously we  
31 discussed two areas of possible qualitative differences, which are the higher lethality  
32 of high LET induced tumors compared to  $\gamma$ -rays or background occurring tumors, and  
33 the deviation from a linear response model due to non-targeted effects (NTE) [12,13].  
34 We include estimates of their impact on GCR risk prediction in the updated analysis of  
35 this report.

36           The use of epidemiology data for populations exposed to  $\gamma$ -rays or other high  
37 energy photons has been the anchor to models that use RBE based QF's to estimate  
38 space radiation risks. Here we note two recent studies provide updated analysis in the  
39 life-span study (LSS) of the survivors of the atomic-bomb explosions in Hiroshima and  
40 Nagasaki Japan in 1945 [14], and over 200,000 radiation workers from France, the  
41 United Kingdom and the United States [15-17]. The LSS analysis of Grant et al. [14]  
42 used revised dosimetry assessment and methods to correct for lifestyle factors  
43 compared to prior assessments [18-20]. An important finding by Grant et al. [14] is that  
44 for total solid cancer risk a linear-quadratic function provided an acceptable fit for

45 males but not females. We consider these new data in our updated model denoted as  
 46 NSCR-2020. For males, excess relative risk (ERR) based on linear coefficients are  
 47 similar in these studies, however larger differences occur for tissue specific rates  
 48 between the LSS and INWORKS studies. Therefore, we restrict our analysis to the  
 49 grouped categories of all solid cancers and leukemia's. We note that INWORKS uses  
 50 mortality data, while we are using the LSS incidence data analysis converted to  
 51 mortality predictions with current data for the US population. In addition, the  
 52 INWORKS study does not provide data on the age or latency dependence of ERR or  
 53 provide data on excess additive risk (EAR). We consider predictions for the US  
 54 Average population, while updates for tissue specific predictions for never smokers  
 55 will be reported in the future.

56

## 57 2. Model Development

58

59 We briefly summarize recent methods developed to predict the risk of exposure  
 60 induced death (REID) for space missions and associated uncertainty distributions [7-  
 61 9]. The instantaneous cancer incidence or mortality rates,  $\lambda_I$  and  $\lambda_M$ , respectively, are  
 62 modeled as functions of the tissue averaged absorbed dose  $D_T$ , or dose-rate  $D_{Tr}$ , gender,  
 63 age at exposure  $a_E$ , and attained age  $a$  or latency  $L$ , which is the time after exposure  
 64  $L=a-a_E$ . The  $\lambda_I$  (or  $\lambda_M$ ) is a sum over rates for each tissue that contributes to cancer risk,  
 65  $\lambda_{IT}$  (or  $\lambda_{MT}$ ). These dependencies vary for each cancer type that could be increased by  
 66 radiation exposure. However here we will group cancers into just two groups  
 67 representing all total solid cancer risks and leukemia risk excluding chronic  
 68 lymphocytic leukemias (CLL). The total risk of exposure induced cancer (REIC) is  
 69 calculated by folding the instantaneous radiation cancer incidence-rate with the  
 70 probability of surviving to time  $t$ , which is given by the survival function  $S_0(t)$  for the  
 71 background population times the probability for radiation cancer death at previous time,  
 72 summing over one or more space mission exposures, and then integrating over the  
 73 remainder of a lifetime [9]:

$$74 \quad REIC(a_E, D_T) = \sum_{j=1}^{N_m} \int_{a_{Ej}} dt \lambda_{Ij}(a_{Ej}, t, D_{Tj}) S_0(t) e^{-\sum_{k=1}^{N_m} \int_{a_E}^t dz \lambda_{Mk}(a_{Ek}, z, D_{Tk})} \quad (1)$$

75 where  $z$  is the dummy integration variable. In equation (1),  $N_m$  is the number of  
 76 missions (exposures), and for each exposure,  $j$ , there is a minimum latency of 5-years  
 77 for solid cancers, and 2-years for leukemia assumed. Tissue specific REIC estimates  
 78 are similar to equation (1) using the single term from  $\lambda_I$  of interest. The equation for  
 79 REID estimates is similar to equation (1) with the incidence rate replaced by the  
 80 mortality rate (defined below).

81 The tissue-specific cancer incidence rate for an organ absorbed dose,  $D_T$ , is  
 82 written as a weighted average of the multiplicative and additive transfer models,  
 83 denoted as a mixture model after adjustment for low dose and dose-rates through  
 84 introduction of the dose and dose-rate effectiveness factor (DDREF) and radiation  
 85 quality through the  $R_{QF}$  factor related to the QF as described below:

86 
$$\lambda_{IT}(a_E, a, D_T, Z, E) = [v_T ERR_T(a_E, a) \lambda_{0IT}(a) + (1 - v_T) EAR_T(a_E, a)] R_{QF}(Z, E) D_T \quad (2)$$

87 where  $v_T$  is the tissue-specific transfer model weight,  $\lambda_{0IT}$  is the tissue-specific cancer  
88 incidence rate in the reference population, and where  $ERR_T$  and  $EAR_T$  are the tissue  
89 specific excess relative risk and excess additive risk per Sievert, respectively. The  
90 tissue specific rates for cancer mortality  $\lambda_{MT}$  are modeled following the BEIR VII  
91 report [20] whereby the incidence rate of Eq. (2) is scaled by the age, sex, and tissue  
92 specific ratio of rates for mortality to incidence in the population under study:

93 
$$\lambda_{MT}(a_E, a, H_T) = \frac{\lambda_{0MT}(a)}{\lambda_{0IT}(a)} \lambda_{IT}(a_E, a, H_T) \quad (3)$$

94 However, we also consider the possibility that high LET radiation increases incidence  
95 to mortality probabilities as described below. The U.S. lifetables from CDC [22] and  
96 cancer rates from SEER [23] with data collected from 2013-2017 are used to provide  
97 age and sex specific rates for survival of all causes of death and all solid cancer or  
98 leukemia excluding CLL. For cancer incidence we used the SEER delay-adjusted rates  
99 that accounts for delays that lead under-reporting of incidence data in the most recent  
100 year [23].

101

## 102 *2.1 ERR and EAR Functions*

103 Epidemiology studies for persons exposed to largely  $\gamma$ -radiation fit various statistical  
104 models to estimate ERR and EAR functions. The ERR and EAR functions used  
105 herein are for all solid cancers and leukemia risk excluding CLL. These functions  
106 depend on age at exposure,  $a_E$ , and attained aged,  $a$ , using the parametric form:

107 
$$EAR \text{ or } ERR(a, a_E) = \beta (a/70)^\eta \exp(\gamma (a_E - 30)) \quad (4)$$

108 Values for the parameters in Eq. (4) from several reports [19,20] using similar functions  
109 are shown in **Table 1**, with calculations reported here using the recent Grant et al.  
110 results for solid cancer [14]. For leukemia risk we use the  $ERR$  and  $EAR$  functions from  
111 the BEIR VII report [21]. The BEIR VII used 60 instead of 70 in Eq. (4) which leads  
112 to a small difference in comparisons. The transfer model coefficient  $v_T$  have a large  
113 impact for individual cancers when background rates vary between the US and Japan,  
114 however predictions are less sensitive for total solid cancer risks. We use the mean  
115 value of  $v_T=0.7$  suggested by the BEIR VII report. For Monte-Carlo sampling we use  
116 a uniform distribution on (0,1) with  $ERR$  chosen if a random number if  $<0.7$  and  $EAR$   
117 chosen if not.

118 The INWORKS study only provide a constant  $ERR$  estimate for males for  
119 cancer mortality caused by radiation [15-17]. We use their estimate for all solid cancers  
120 that assume a 5-year lag as in the LSS study with  $ERR = 0.37$  per Gy with 90%  
121 confidence intervals [0.1, 0.67]. For all leukemia's excluding CLL,  $ERR= 2.96$  [1.17,  
122 5.21].

123 **Table 1.** Parameters of ERR and EAR functions described in the report from various sources [14,20,21].

|                                | $\beta_M$ , Gy <sup>-1</sup>                  | Attained Age power             | Age at exposure                       | $\beta_M$ , Gy <sup>-1</sup>                    | Attained Age power      | Age at exposure, y <sup>-1</sup> |
|--------------------------------|-----------------------------------------------|--------------------------------|---------------------------------------|-------------------------------------------------|-------------------------|----------------------------------|
|                                | <b>ERR Model, Males</b>                       |                                |                                       | <b>ERR Model, Females</b>                       |                         |                                  |
| <b>RERF, 2007*</b>             | 0.35 [0.28, 0.43]                             | -1.65<br>[-2.1, -1.2]          | -0.0186<br>[-0.0073, 0.0288]          | 0.58 [0.4, 0.54]                                | -1.65<br>[-2.1, -1.2]   | -0.0186<br>[-0.0029, 0.0073]     |
| <b>BEIR VII</b>                | 0.33 [0.24, 0.47]                             | -1.4 [-2.2, -0.7]              | 0                                     | 0.57 [0.44, 0.74]                               | -1.4 [-2.2, -0.7]       | 0                                |
| <b>RERF, 2017</b>              | -                                             | -                              | -                                     | 0.64 [0.52, 0.77]                               | -1.36<br>[-1.86, -0.84] | -0.0249<br>[-0.0139, -0.0357]    |
| <b>RERF, 2017<br/>LQ model</b> | 0.094 [<0.02, 0.23]                           | -2.7<br>[-3.58, -1.81]         | -0.0249<br>[-0.0139, -0.0357]         | -                                               | -                       | -                                |
| <b>RERF, 2017**</b>            | <i>0.33 [0.25, 0.42]</i>                      | <i>-1.66<br/>[-2.11, -1.2]</i> | <i>-0.0236<br/>[-0.0128, -0.0343]</i> | 0.64 [0.52, 0.76]                               | -1.36<br>[-1.86, -0.84] | -0.0249<br>[-0.0139, -0.0357]    |
|                                | <b>EAR Models, Males per 10,000 PY per Gy</b> |                                |                                       | <b>EAR Models, Females per 10,000 PY per Gy</b> |                         |                                  |
| <b>RERF, 2007*</b>             | 43 [33,55]                                    | 2.38 [1.9, 2.8]                | -0.0274<br>[-0.0174, -0.0386]         | 60 [51, 69]                                     | 2.38 [1.9, 2.8]         | -0.0274<br>[-0.0174, -0.0386]    |
| <b>BEIR VII</b>                | 22 [15,30]                                    | 2.8 [2.15, 3.41]               | 0                                     | 28 [22, 36]                                     | 2.8 [2.15, 3.41]        | 0                                |
| <b>RERF, 2017</b>              | -                                             | -                              | -                                     | 54.7 [44.7, 65.3]                               | 2.07 [1.64, 2.53]       | -0.0357<br>[-0.0249, -0.0462]    |
| <b>RERF, 2017<br/>LQ model</b> | 21.7 [<-1.7, 47.7]                            | 2.89 [2.14, 3.68]              | -0.0357<br>[-0.0249, -0.0462]         | -                                               | -                       | -                                |

124 \*90% Confidence intervals

## 125 2.2. Space Radiation Quality Factor

126 Our radiation quality approach uses concepts for particle track structure to  
127 devise a functional form that is fit to available radiobiology data to formulate a radiation  
128 quality factor. In this approach QF depends on particle charge number and kinetic  
129 energy or equivalent velocity. This is different from the International Commission on  
130 Radiological Protection (ICRP) approach where QFs are based on LET alone or similar  
131 the use of a radiation weighting factors that is dependent on particle type but not LET.

132 The hazard function in Eq. (1) is scaled to other radiation types and low dose-  
133 rates using a scaling factor denoted,  $R_{QF}$ , which is made-up of a QF and DDREF. The  
134  $R_{QF}$  is estimated from relative biological effectiveness factors (RBE's) determined from  
135 low dose and dose-rate particle data relative to acute  $\gamma$ -ray exposures, which we denote  
136 as  $RBE_{\gamma Acute}$  to distinguish from estimates from  $RBE_{max}$  based on less accurate initial  
137 slope estimates. The scaling factor is written [9]:

138

$$139 \quad R_{QF} = Q_L(Z, E) / DDREF + Q_H(Z, E) \quad (5)$$

140 where

$$141 \quad Q_L(Z, E) = [1 - P(Z, E)] \quad (5a)$$

142

$$143 \quad Q_H(Z, E) = 6.24 \Sigma_0 P(Z, E) / (\alpha_\gamma L) \quad (5b)$$

144 with the parametric function,

$$145 \quad P(Z, E) = [1 - \exp(-Z^{*2} / \kappa \beta^2)]^m [1 - \exp(-E / 0.2)] \quad (6)$$

146 where  $E$  is the particles kinetic energy per nucleon,  $L$  is the LET,  $Z$  is the particles  
147 charge number,  $Z^*$  the effective charge number, and  $\beta$  the particles speed relative the  
148 speed of light. The three model parameters ( $\Sigma_0 / \alpha_\gamma$ ,  $\kappa$  and  $m$ ) in Eq.'s (5-6) are fit to  
149 radiobiology data for tumors in mice or surrogate cancer endpoints as described  
150 previously [8,9,23,24]. Values and the cumulative distribution function (CDF) for  
151 Monte-Carlo sampling for the DDREF are described below. Distinct parameters are  
152 used for estimating solid cancer and leukemia risks based on estimates of smaller RBEs  
153 for acute myeloid leukemia and thymic lymphoma in mice compared to those found for  
154 solid cancers [9].

155 An ancillary condition is used to correlate the values of the parameter  $\kappa$  as a  
156 function of  $m$  as

$$157 \quad \kappa(m) = \frac{4\kappa_0}{(m+1)} \quad (7)$$

158 where  $\kappa_0$  is value for the most likely value  $m=3$ . In Monte-Carlo sampling by the model,  
159 conditional sampling is used where  $m$  is selected from a CDF followed by selection of  
160  $\kappa(m)$ , which then distributed with a normal distribution with SD shown in **Table 2**.

161 A key assumption of the model is that the low ionization density part of a  
 162 particle track is influenced by dose-rate effects as represented by the first term on the  
 163 right-hand side of Eq. (5). However, the high ionization density part or so-called core  
 164 of a particles track has no dependence on dose-rate as described by the second term on  
 165 the right-hand side of Eq. (5). The low ionization density part of the track is high-energy  
 166  $\delta$ -rays and they are expected to produce biological damage in a manner similar to low  
 167 doses of  $\gamma$ -rays [23]. A dose-rate modifier is needed for the low ionization density track  
 168 regions because model parameters are largely derived from radiobiological data at  
 169 higher doses and dose-rates than those occurring in space, while a DDREF is used for  
 170 this estimate.

171 The space radiation QF model corresponds to a pseudo-action cross section of  
 172 the form which is of interest for fluence based risk prediction approaches,

$$173 \quad \Sigma_{TE}(Z, E) = \Sigma_0 P(Z, E) + \alpha_\gamma L[1 - P(Z, E)] / 6.24 \quad (8)$$

174 The  $\Sigma$  is denoted as a pseudo-biological action cross section for tumor induction in units  
 175 of  $\mu\text{m}^2$  with the designation as “pseudo” given because time-dependent factors have  
 176 been suppressed, which impact values for the cross-sectional area predicted by fits to  
 177 the experiments.

178 The value of  $\Sigma_0/\alpha_\gamma$  estimated from mouse tumor studies [9] are shown in **Table**  
 179 **3**. We prefer to exclude mouse liver and Harderian gland values. The values for liver  
 180 tumors are observed to be much larger in male compared to female mice, which needs  
 181 to be further investigated. Harderian gland data are excluded here because this tissue  
 182 does not appear in humans, and because related data are used as input for the other QF  
 183 parameters so as not to put too much weight on a single model system. The CDF then  
 184 follows a Gompertz equation with the parameters listed in **Table 3**.

185

186 **Table 2. Parameters for central estimate of NASA quality factor (QF)**  
 187 **parameters for solid cancer and leukemia risks [9].\***

| Parameter                                                            | Solid Cancer         | Leukemia            |
|----------------------------------------------------------------------|----------------------|---------------------|
| <b>m</b>                                                             | 3±0.5                | 3±0.5               |
| <b><math>\kappa</math></b>                                           | 624±69 (1000±250)    | 624 ± 69 (1000±250) |
| <b><math>\Sigma_0/\alpha_\gamma, \mu\text{m}^2 \text{ Gy}</math></b> | (2897±357)/6.24      | (1750±250)/6.24     |
| <b>Non-Targeted Effects Parameters</b>                               |                      |                     |
| <b><math>\eta_0/\alpha_\gamma, \text{Gy}^{-1}</math></b>             | 6 x10 <sup>-5</sup>  | -                   |
| <b><math>\eta_1</math></b>                                           | 833± 200 (1000±150)  | -                   |
| <b><math>A_{\text{bys}}</math></b>                                   | 2000 $\mu\text{m}^2$ |                     |

188 \*Values in parenthesis are distinct values for light ions ( $Z \leq 4$ ).



189 **Table 3.** Cumulative distribution function (CDF) for model parameter ( $\Sigma_0/\alpha_\gamma$ ) determined by fits to data for heavy ions and fission  
 190 neutrons\*. Means and fits of CDF corresponding to values of **Table 3** using logistic or Gompertz equations are shown with best fit  
 191 shown in bold font.

192

| <i>Data sets</i>                                                | <i>Mean, <math>\mu\text{m}^2 \text{Gy}</math></i> | <i>A</i>                        | <i>B, <math>\mu\text{m}^2 \text{Gy}</math></i> | <i>C</i>                              | <i>Adj R<sup>2</sup></i> |
|-----------------------------------------------------------------|---------------------------------------------------|---------------------------------|------------------------------------------------|---------------------------------------|--------------------------|
| <i>All solid cancer data</i>                                    | (4728 $\pm$ 1378)/6.24                            |                                 |                                                |                                       |                          |
| <i>Logistic Equation Fit</i>                                    |                                                   | <b>1.0<math>\pm</math>0.027</b> | <b>(2699<math>\pm</math>87)/6.24</b>           | <b>-2.42<math>\pm</math>0.16</b>      | <b>0.997</b>             |
| <i>Gompertz Equation Fit</i>                                    |                                                   | 1.0 $\pm$ 0.02                  | (2195 $\pm$ 55.2)/6.24                         | (1551 $\pm$ 84.8)/6.24                | 0.987                    |
| <i>Solid cancer excluding liver, and Harderian gland tumors</i> | (2897 $\pm$ 357)/6.24                             |                                 |                                                |                                       |                          |
| <i>Logistic Equation Fit</i>                                    |                                                   | 1.0 $\pm$ 0.053                 | (2483 $\pm$ 110)/6.24                          | -3.26 $\pm$ 0.39                      | 0.974                    |
| <i>Gompertz Equation Fit</i>                                    |                                                   | <b>1.0<math>\pm</math>0.039</b> | <b>(2104<math>\pm</math>68.7)/6.24</b>         | <b>(1109<math>\pm</math>110)/6.24</b> | <b>0.979</b>             |

193

194 \*Parameters that result from fits of the logistic equation,  $\text{CDF} = A/[1+(\Sigma_0/\alpha_\gamma)/B]^C$  or Gompertz equation  $\text{CDF} = A \exp[-\exp(-\Sigma_0/\alpha_\gamma - B)/C]$  to data  
 195 for ( $\Sigma_0/\alpha_\gamma$ ) from mouse experiments for heavy ions and fission neutrons.

196

197

198

199

200

### *2.3. Dose and Dose-Rate Reduction Effectiveness Factor*

Dose-rate is known to alter radiobiological effects at moderate to high doses. This is due to the effect of DNA repair, and modulation of tissue responses. For experimental studies with low particle fluences corresponding to less than one particle traversal per cell nucleus no dose-rate effect is expected at the molecular or cellular level, however tissue responses cannot be ruled out. For spaceflight of duration of a few years or less dose protraction effects, which are distinct from dose-rate effects, are not considered. Estimating the DDREF for space exposures has the additional consideration compared to photon exposures on Earth because of the possible correlations between a dose-rate modifier and RBEs used to formulate a QF. Large RBE's are often associated with large DDREFs.

In Cucinotta et al. [9], Bayesian analysis was used to model the PDF of uncertainty in the DDREF parameter for solid cancer risk estimates in a manner similar to that used in the BEIR VII report [20] where a prior distribution was estimated from the curvature in the Japanese Life-Space Study (LSS) and the likelihood function from radiobiology data. We denoted as Model A the prior distribution from the BEIR VII Report estimate for the LSS study using a log-normal distribution with a DDREF=1.3 and 95% confidence intervals (CI) of [0.8, 1.9]. However, Hoel [25] has argued that due to subjective assumptions made in the BEIR VII report a mean DDREF of 1.3 is found, while an analysis that considers a distinct dose range from the LSS data or one that includes downward curvature at higher doses due to cell sterilization effects finds a DDREF of 2 or more. Following Hoel's analysis we used in Model B a mean DDREF of 2; however, uncertainties in this value were not modeled by Hoel. Here we assume a log-normal distribution with 90% confidence intervals of [1.2, 3] as a prior distribution for Model B based on the bounds described by Hoel [25]. Interestingly study of the curvature in dose response in the most recent LSS data by Grant et al [14] suggest a DDREF between 2 and 3 for males, while a DDREF~1 for females. The effects of the large heterogeneous population in the study is a challenge for interpretation. In contrast experimental systems offer a more precise method to estimate DDREF, however in less significant model systems and in some cases endpoints.

In our previous report we considered DDREFs from mouse solid tumor studies data where both  $\gamma$ -ray and high LET radiation were available. These data were used as the likelihood function for the Bayesian analysis as shown in **Figure 1** (upper panel). We did not consider ovarian and leukemia mouse data that was used by BEIR VII as appropriate for this analysis [8,9]. More recent experiments on heavy ion induction of colorectal and intestinal tumors (Suman et al., 2016) in mice did not provide other data to modify this aspect of the PDF of uncertainty for the DDREF because the  $\gamma$ -ray components of these experiments were limited, while dose responses for  $\gamma$ -rays in the recent Harderian gland experiments [26] were consistent with earlier data for Harderian gland tumors [27-29].

Values of DDREF's estimated from high-energy proton experiments are of interest because the energy spectra of  $\delta$ -rays more closely represent that of GCR compared to  $^{60}\text{Co}$   $\gamma$ -rays [9]. We also surveyed published proton radiobiology data for tumors in animals and surrogate endpoints in cell culture models. Here we considered data comparing acute to low dose-rates, and analysis of curvature in acute dose response data to estimate a DDREF. In cell experiments several studies comparing high dose-rate to low dose-rates have been reported, which were summarized earlier [9]. DDREF estimates from proton experiments varied from 2.14 to 4.46 and strongly overlapped

**Figure 1.** Bayesian analysis of probability distribution function (PDF) for the dose and dose-rate reduction effectiveness factor (DDREF). Upper panel uses prior distribution from the Japanese atomic-bomb lifespan study (LSS) estimated in BEIR VII [20] with mean DDREF of 1.3 and likelihood function from mouse solid tumor studies with  $\gamma$ -rays. Lower panel uses mean DDREF of 2 as described in text for LSS study for the prior distribution, and likelihood function with mouse solid tumor studies with  $\gamma$ -rays and dose-rate studies for protons in surrogate cancer risk endpoints.

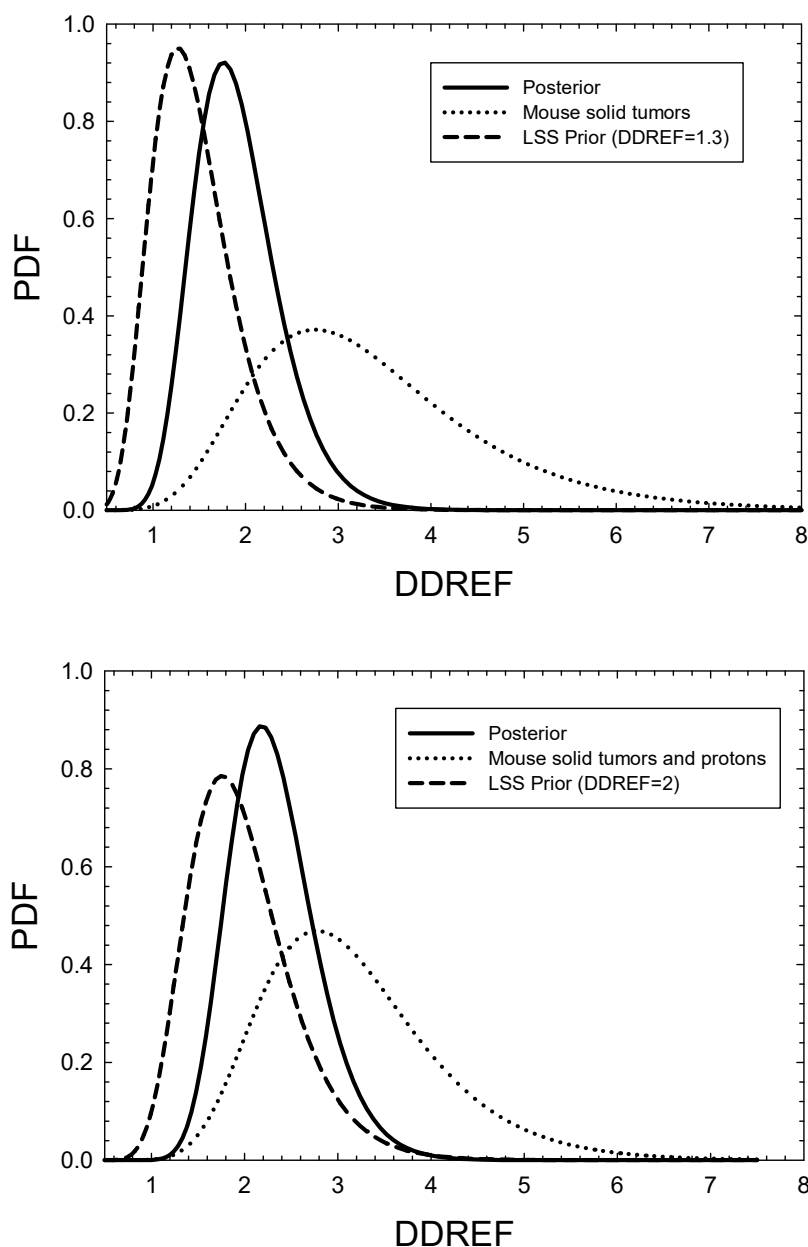

1 with estimates from solid cancers in mice exposed to acute and chronic doses of  $\gamma$ -rays.  
 2 **Figure 1** (lower panel) shows the resulting PDF of the DDREF uncertainty in Model  
 3 B which can be compared to our earlier publication for Model A [9].

4

#### 5 *2.4. Non-Targeted Effect Estimates*

6 Non-targeted effects (NTE) have been shown to impact initiation, promotion  
 7 and progression stages of tumorigenesis at low doses of high LET radiation [30-40].  
 8 Initiation processes impacted by NTEs include chromosomal exchanges, sister  
 9 chromatid exchanges, gene mutation, and neoplastic transformation, which show a  
 10 characteristic non-linear dose response at low particle fluences where less than one  
 11 particle traverses a cell nucleus. A similar functional response provided an optimal  
 12 global fit to the Harderian gland tumor study with several heavy ions [24]. Studies with  
 13 La and Nb beams, which have action inactivation cross sections approaching or  
 14 exceeding the cell nuclear area, suggest no cells directly traversed by these ions survive  
 15 providing important evidence for NTE in this system. The use of chimera models where  
 16 irradiated tissues absent of epithelial cells produce tumors after cell implant suggests  
 17 changes to the micro-environment promote mammary tumors in mice [31]. Tissue are  
 18 complex non-linear signaling systems contain multiple steady-states which can prevent  
 19 excitability properties upon relaxation [41] leading to altered signaling and changes in  
 20 proliferation and organization contributing to cancer development.

21 In our model we assume the TE contribution is also valid with a linear response  
 22 to the lowest dose or fluence considered, while an additional NTE contribution occurs  
 23 such a pseudo-action cross section is given by [24],

$$24 \quad \Sigma_{NTE}(Z, E) = \Sigma_{TE}(Z, E) + \eta(Z, E, F) / F \quad (9)$$

25 where  $F$  is the particle fluence (in units of  $\mu\text{m}^2$ ) and the  $\eta$  function represents the NTE  
 26 contribution, which is parameterized as a function of  $X_{Tr} = Z^2/\beta^2$  as:

$$27 \quad \eta = \eta_0 X_{Tr} e^{-\eta_1 X_{Tr}} [1 - e^{-FA_{bys}}] \quad (10)$$

28 In Eq. (10) the area,  $A_{bys}$ , reflects the number of bystander cells surrounding a cell  
 29 traversed directly by a particle that receives an oncogenic signal. The RBE is related to  
 30 the cross section by  $RBE = 6.24 \Sigma / (LET \alpha_\gamma)$  where  $\alpha_\gamma$  is the  $\gamma$ -ray linear slope coefficient.  
 31 Therefore, only the ratio of parameters  $\eta_0/\alpha_\gamma$  is needed for risk estimates.

32 The parameters  $\eta_0/\alpha_\gamma$  and  $\eta_1$  are estimated from low dose radiobiology  
 33 experiments [24]. The second factor on the right- hand side of Eq. (9) describes the  
 34 “turning on” of NTE at very low doses. The Harderian gland tumor model and  
 35 chromosomal aberration experiments do not provide data of sufficiently low doses  
 36 ( $<0.01$  Gy) to determine at which dose or fluence level this occurs, and if it depends on  
 37 radiation quality or the temporal patterns of irradiation. Therefore, the parameter  $A_{bys}$   
 38 is difficult to estimate. We note that its value is correlated with estimates of  $\eta_0$  at very  
 39 low fluence since Eq. (10) here reduces to  $\eta \sim (\eta_0 A_{bys}) X_{Tr} \exp(-\eta_1 X_{Tr}) F$ .

40 Several cell culture experiments were performed with  $\alpha$ -particle irradiation  
41 which allow estimates of  $A_{bys}$ . **Figure 2** shows an example for neoplastic  
42 transformation by 90 keV/ $\mu\text{m}$   $\alpha$ -particles with symbols with errors from experiments  
43 by Bettega et al. [40] and lines our model dose response function illustrating very low  
44 dose responses as  $A_{bys}$  varies. A possible turn-down of NTE at higher doses ( $>0.1$  Gy)  
45 is ignored here because at these doses TE are expected to dominate. We find for a  
46 typical mammalian cell nucleus area of  $100 \mu\text{m}^2$  that values of  $A_{bys}$  of 1000 to 2000  $\mu\text{m}^2$   
47 correspond to an NTE signal of about 1-cell layer and  $A_{bys}$  of 5000  $\mu\text{m}^2$ , a signal that  
48 propagates to about 2 cell layers from a directly hit cell. These areas suggest interaction  
49 distances of up to 50 microns from a directly traversed cell, and a reduction in NTE for  
50 doses below about 0.01 Gy (1 rad) where the NTE contribution decrease from a dose  
51 independent to linear response, while at higher doses ( $>0.1$  Gy) TE dominate.

52

53 **Figure 2.** Dose response for neoplastic transformation of C3H10T1/2 cells by 90 keV/ $\mu\text{m}$   
54 alpha particles. Experiments are from Bettega et al. [40]. Model shows characteristic mixed  
55 TE and NTE effects with NTE dominating at GCR type heavy ion doses ( $<0.1$  Gy). Area of  
56 NTE estimated as  $A_{bys} \sim 2000 \mu\text{m}^2$ .

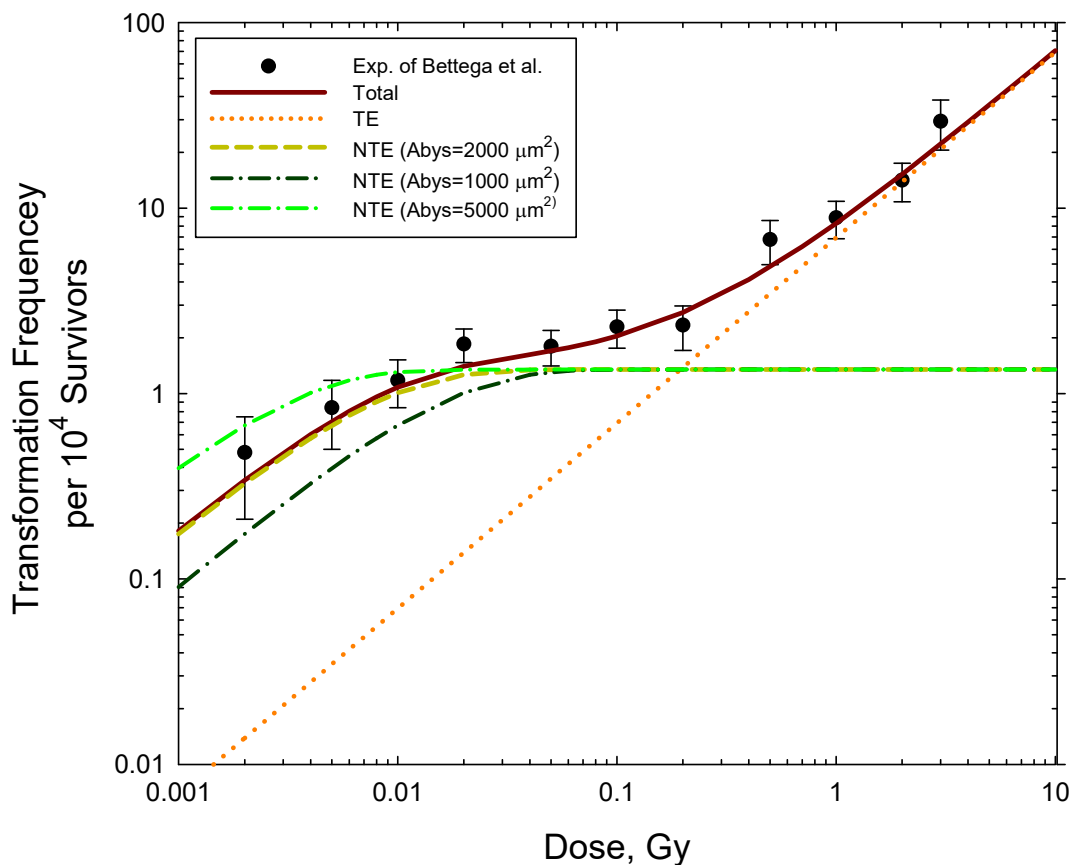

57

58

59

## 60 2.5 Implementation for GCR Exposures

61 GCR exposures include primary and secondary H, He and HZE particles, and  
62 secondary neutrons, mesons, electrons, and  $\gamma$ -rays over a wide energy range. We used  
63 the HZE particle transport computer code (HZETRN) with quantum fragmentation  
64 model nuclear interaction cross sections and Badhwar–O'Neill GCR environmental  
65 model to estimate particle energy spectra for particle type  $j$ ,  $\varphi_j(Z,E)$  as described  
66 previously [6, 42-46]. These methods agree with spaceflight data in low Earth orbit [4],  
67 in transit to Mars [44] and on the Mars surface [45] to within 15% for dose and dose  
68 equivalent. However larger differences between measurements and models occur for  
69 specific energy regions of particle spectra and therefore we have assigned a 25%  
70 variance for  $Z>2$  and 35% for  $Z=1,2$  ions.

71 For the TE model, a mixed-field pseudo-action cross section is formed by weighting  
72 the particle flux spectra,  $\varphi_j(E)$  for particle species,  $j$ , contributing to GCR exposure  
73 evaluated with the HZETRN code with the pseudo-biological action cross section for  
74 mono-energetic particles and summing over all particles and kinetic energies:

$$75 \quad (\Sigma F)_{TE} = \sum_j \int \varphi_j(Z, E) \Sigma(Z_j, E) dE \quad (11)$$

76 For estimates of NTEs to GCR exposures we assume: 1.) The probability that a  
77 bystander cell receives an oncogenic signal only occurs if the fluence is sufficiently  
78 high such that a nearby cell is traversed. 2.) The time dependence of the bystander  
79 signals is a few days or less such that interactions of bystander signals from different  
80 HZE particles can be ignored because of the low fluence in space. 3.) The probability  
81 that a bystander cell is transformed by a direct hit at a different time is small and can  
82 be ignored. Equations for the mixed-field pseudo-action cross section in the NTE model  
83 as folded with particle specific energy spectra as:

84

$$85 \quad (\Sigma F)_{NTE} = \sum_j \int \{ \varphi_j(Z, E) \Sigma(Z_j, E) + \eta_0 X_{Tr_j} \exp(-\eta_1 X_{Tr_j}) [1 - \exp(-A_{bys} \varphi_j(E))] \} dE$$

86 (12)

87

## 88 2.6 Sensitivity Study of Increased Tumor Lethality at High LET

89

90 We use the BEIR VII method to convert the LSS data from incidence to  
91 mortality predictions. This approach accounts to some extent to differences in  
92 conversion rate over time due to time-dependent differences in cure rates. However,  
93 these are still major questions on whether the quality of tumors produced depends on  
94 radiation quality. RBEs' for both incidence and lethality in mice have not been reported,  
95 while differences in rates of metastasis and malignancies of tumors produce suggest  
96 difference do occur [47-54]. We estimated the effects of higher tumor lethality for HZE  
97 particles and neutrons in the following manner. An upper limit on the possibility of  
98 higher tumor lethality would be to use REIC estimates for REID estimates on space  
99 missions. However, this estimate would be too large due to the presence of low LET

100 particles such as protons that make up a significant fraction of space radiation organ  
 101 doses or the low ionization density part of HZE particle tracks which are a low LET  
 102 radiation. To make a more realistic estimate of the effects of an increased lethality the  
 103 cancer mortality rate is modified as [7]

104

$$105 \quad \lambda_{MT} \approx \frac{\lambda_{0MT}(a)}{\lambda_{0IT}(a)} \lambda_{IT} \left\{ \sum_j \int dE \phi_{jT}(E) L_j(E) (1 - P(X_{ir})) + (\Sigma_0 / \alpha_\gamma) F_{lethal} \int dX_{ir} \phi_T(X_{ir}) P(X_{ir}) \right\}$$

106 (13)

107

108 The first term in Eq. (13) dominates for low LET radiation and is not altered under the  
 109 considerations of increased tumor lethality for highly ionizing radiation. The second  
 110 term in Eq. (13) is increased by a tumor lethality fraction,  $F_{lethal}$  which estimates the  
 111 increased lethality or rates of metastasis observed in mouse tumor induction studies  
 112 with heavy ions. The second term in equation (13) has been reduced to be independent  
 113 of the particle type,  $j$ , using the variable  $X_{ir} = Z^2/\beta^2$  as described previously [6-9]. For  
 114 the sensitivity study of  $F_{lethal}$ , we considered a PDF to represent the uncertainty in the  
 115 increased lethality for HZE particles and secondary charged particles from neutrons.  
 116 The PDF is modeled as a normal distribution with several values considered assuming  
 117 a 25% variance. We note that the RBE values for solid tumors considered previously  
 118 were for tumor incidence and the sensitivity study of Eq.(13) is not used for leukemia  
 119 risk estimates because there is no evidence for increased high LET mortality compared  
 120 to low LET from mouse studies.

121

122 For the application of the NSCR model to space mission predictions, the energy  
 123 spectra for each particle type,  $j$  of LET,  $L_j(E)$  for each tissue, T contributing to cancer  
 124 risk denoted as  $\phi_T(E)$  is estimated from radiation transport codes. The particle energy  
 125 spectra are folded with  $R_{QF}$  to estimate tissue specific REIC or total REID values. For  
 126 calculations for a fluence  $\phi_T(Z,E)$  and absorbed dose,  $D_T(Z,E)$  of a particle type  
 127 described by  $Z$  and  $E$ , the Hazard rate is

128

$$129 \quad \lambda_{ZI}(F_T, a_E, a) = \lambda_{\gamma I}(a_E, a) \left\{ D_T(Z, E) \frac{(1 - P(Z, E))}{DDREF} + (\Sigma_0 / \alpha_\gamma) P(Z, E) \phi_T(Z, E) \right\}$$

130 (14)

131 where  $\lambda_{\gamma I}$  is the inner bracketed terms that contains the  $ERR$  and  $EAR$  functions for  
 132 individual tissues. As described previously [9] calculations are made using models of  
 133 the GCR environments and radiation transport in spacecraft materials and tissue, which  
 134 estimate the particle energy spectra,  $\phi_j(E)$  for 190 isotopes of the elements from  $Z=1$  to  
 135 28, neutrons, and dose contributions from pions, electrons and  $\gamma$ -rays.

136

137 The calculation is simplified by introducing the fluence spectra,  $F(X_{ir})$  where  
 138  $X_{ir} = Z^2/\beta^2$ , which can be found by transforming the energy spectra,  $\phi_j(E)$  for each  
 particle,  $j$  of mass number and charge number,  $A_j$  and  $Z_j$  respectively as:

139 
$$F(X_{tr}) = \sum_j \left( \frac{\partial X_{tr}}{\partial E} \right)^{-1} \phi_j(E) \quad (15)$$

140 where we evaluate the Jacobian in equation (12) using the Barkas form for the  
141 effective charge number given by

142 
$$Z^* = Z(1 - e^{-125\beta/Z^{2/3}}) \quad (16)$$

143 This transformation allows the REID calculation to occur with the tissue specific  $Z^*/\beta^2$   
144 spectra for light and heavy ions rather than the individual  $Z$  and  $E$  spectra.

145

## 146 *2.7. Summary of Parameter Uncertainty PDFs*

147 For the various parameters that enter into the model PDFs that are estimated  
148 from experimental data and model comparisons to represent plausible ranges of values.  
149 The uncertainty in the ERR and EAR parameters are taken directly from the  
150 publications noted above. Values showed modest skewing and therefore we used a  
151 normal distribution for each parameter with standard deviations (SD) estimated from  
152 the publications. Our recent report [9] used solid tumor data in mice directly to model  
153 the value and PDF for the parameter  $\Sigma_0/\alpha_\gamma$ , where the PDF is represented by the  
154 Gompertz equation (**Table 3**). Bayesian analysis is used to model the uncertainty in the  
155 DDREF parameter. The BEIR VII Report estimate [17] for the Japanese Life-Span  
156 Study (LSS) study of DDREF=1.3 with 95% confidence intervals (CI) of [0.8, 1.9] was  
157 used as the prior distribution, which is updated using Bayes' theorem with the  
158 likelihood function represented by a log-normal distribution. The resulting posterior  
159 distribution has a mean value of 1.88 with 95% CI of [1.18, 3.0]. For the central values  
160 of REID estimates for space missions discussed below we continue to use the value  
161 DDREF=2, however the posterior distribution is used to represent the PDF for the  
162 DDREF uncertainty in the analysis described here, which is also fit to a log-normal  
163 distribution (**Table 4**). Other parameters are similar to early versions of NSCR.

164



165 **Table 4.** Summary of Probability Distribution Function (PDF) used for various terms  
 166 and their parameters.

| Model Term                                    | CDF for Monte-Carlo Sampling                     | Parameters                                                        |
|-----------------------------------------------|--------------------------------------------------|-------------------------------------------------------------------|
| ERR, EAR functions                            | Normal                                           | SD for parameters from source with additional 10% variance added. |
| DDREF                                         | Log-Normal                                       | GM=0.83; GSD=1.22                                                 |
| QF parameter, $\Sigma_0$                      | Gompertz Equation                                | See Table 3.                                                      |
| QF parameter, $m$                             | Normal                                           | SD=0.333                                                          |
| QF parameter, $\kappa$                        | Conditional sampling on $m$ , followed by Normal | SD=0.25                                                           |
| NTE parameter, $\eta_0 \times A_{\text{bys}}$ | Normal (See Table 2).                            | SD=0.333                                                          |
| NTE parameter, $\eta_1$                       | Normal (See Table 2)                             | SD=0.333                                                          |
| Fluence $Z=1,2$                               | Normal                                           | $M=1$ ; $SD = 0.35$                                               |
| Fluence $Z>2$                                 | Normal                                           | $M=1$ ; $SD = 0.25$                                               |

167

### 168 3. Results and Discussion

169

170 For all calculations we considered 45-y US Average male or female astronauts, and  
 171 assumed an average spacecraft shielding amount of 20 g/cm<sup>2</sup> of aluminum for annual  
 172 GCR exposures near solar minimum. Predictions of REID for other shielding materials  
 173 and amounts, and for other ages at exposure were considered previously for the NSCR-  
 174 2012 model [6]. In **Table 4** and **Figure 3** we show %REID predictions and 95%  
 175 confidence intervals (CI) for various uncertainty inclusions. We use the value for  $\Sigma_0/\alpha_\gamma$   
 176 that excludes liver and Harderian gland data. Use of these values would increase  
 177 estimates by ~30%. For males we use the linear fits which is consistent with the main  
 178 result for females in the LSS report. However, Grant et al. [14] found an improved fit  
 179 for males using a linear-quadratic dose response model, which is discussed below. The  
 180 inclusion of the DDREF uncertainty tends to lower REID predictions, however it is not  
 181 a large effect since the QF has been defined such that the track core term is independent  
 182 of dose-rate.

183 The uncertainties in the quality factor parameters dominate the uncertainty and  
 184 shift average %REID predictions to higher values. The ratio of the upper 95% CI to the  
 185 average value is <2.8. In **Table 5** we show a breakdown of the QF uncertainty for  
 186 female astronaut %REID predictions. Result show that the  $\Sigma_0/\alpha_\gamma$  uncertainty makes the  
 187 largest contribution followed by the uncertainty in the  $\kappa$  parameter. **The value of  $m$**   
 188 **which is highly constrained based on previous analysis [9,13] plays only a minor**  
 189 **role, which suggests the QF has been reduced in effect to a two-parameter model.**

190 For males we made a comparison of the LSS models to the INWORKS models  
191 (Table 6). Here the INWORKS analysis considers only ERR and does not consider any  
192 age or time after exposure parameterizations for the adult worker populations in the  
193 study. The life-table representing age dependent background cancers and deaths due to  
194 competing risks thus represent the only time dependent factors in this INWORKS  
195 application, while the LSS studies provide time dependencies as described by Eq. (4).  
196 It would be difficult to assess the higher prediction of the INWORKS rates to a single  
197 factor. Other differences include chronic versus acute exposure, contributions to organ  
198 doses from neutrons, and the effects of the various background populations in the  
199 different studies. In addition, we are using the incidence data from LSS converted to  
200 mortality using Eq. (3), while mortality data is used directly in the INWORKS study.  
201 Incidence to mortality conversion varies with time period, host country, and individual  
202 subjects health care all of which can impact the result.

203

204 **Figure 3.** %REID predictions for 45-year old Females with different model uncertainties  
205 considered.

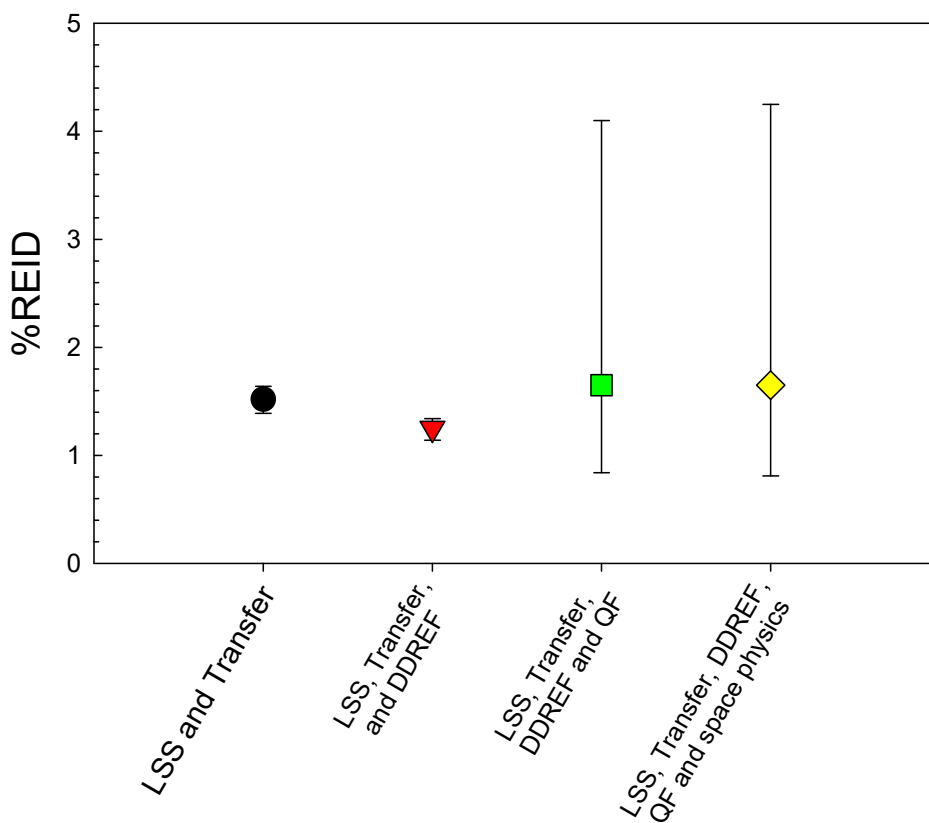

206  
207  
208  
209  
210

211 **Table 4.** % REID and uncertainties for 45 y old female and male astronauts for  
 212 annual GCR exposure near solar minimum with 20 g/cm<sup>2</sup> aluminum shielding.  
 213

| Uncertainties included                                | %REID | 95% Confidence Intervals |
|-------------------------------------------------------|-------|--------------------------|
| <b>Females</b>                                        |       |                          |
| <b>LSS and Transfer</b>                               | 1.53  | [1.38, 1.63]             |
| <b>LSS, Transfer and DDREF</b>                        | 1.19  | [0.98, 1.43]             |
| <b>LSS, Transfer, DDREF, and QF</b>                   | 1.6   | [0.71, 4.06]             |
| <b>LSS, Transfer, DDREF, QF and space organ dose</b>  | 1.64  | [0.69, 4.35]             |
| <b>Males</b>                                          |       |                          |
| <b>LSS and Transfer</b>                               | 1.14  | [1.05, 1.21]             |
| <b>LSS, Transfer and DDREF</b>                        | 0.92  | [0.77, 1.09]             |
| <b>LSS, Transfer, DDREF, and QF</b>                   | 1.21  | [0.59, 2.91]             |
| <b>LSS, Transfer, DDREF, QF, and space organ dose</b> | 1.24  | [0.58, 3.14]             |

214  
 215  
 216 **Table 5.** Comparison of 45-y old males %REID predictions using LSS and  
 217 INWORKS coefficients in multiplicative risk model or mixture model (LSS linear-  
 218 quadratic).  
 219

| Low LET Model                                                    | % REID | 95% CI       |
|------------------------------------------------------------------|--------|--------------|
| <b>LSS Linear (DDREF=2)</b>                                      | 1.24   | [0.58, 3.14] |
| <b>LSS linear-quadratic fit using linear term only (DDREF=1)</b> | 0.6    | [0.4, 1.18]  |
| <b>INWORKS (DDREF=1)</b>                                         | 2.45   | [1.23, 5.9]  |

220  
 221  
 222 **Table 6.** Sensitivity of %REID predictions on uncertainties in parameters of the  
 223 cancer risk cross section for 45-y old females for annual GCR exposure near solar  
 224 minimum. All non-QF uncertainties for a conventional model included.  
 225

| Uncertainty after Model Parameter Eliminated          | %REID | 95% CI       |
|-------------------------------------------------------|-------|--------------|
| <b>m</b>                                              | 1.6   | [0.7, 4.2]   |
| <b>κ</b>                                              | 1.42  | [0.77, 3.2]  |
| <b>Σ<sub>0</sub>/α<sub>γ</sub>, μm<sup>2</sup> Gy</b> | 1.46  | [0.73, 2.84] |
| <b>All uncertainties</b>                              | 1.64  | [0.69, 4.35] |

226  
 227

### 228 3.1. Uncertainties due to Qualitative Differences

229

230 The application of radiation quality factors accounts for quantitative differences  
231 between radiation types, however does not represent possible qualitative differences in  
232 cancer risk for different types of radiation. Possible qualitative differences suggested  
233 by past studies include non-targeted effects, and differences in tumor lethality not  
234 estimated with RBEs based on tumor incidence or surrogate markers. Differences in  
235 latency and genetic background on radiation quality are also possible however there is  
236 insufficient data to make numerical estimates in this area.

237 Several reports [47-53] have suggested that HZE particles and neutrons could  
238 produce more lethal tumors compared to tumors produced by low LET radiation or  
239 background tumors. For low LET radiation there is an implicit assumption made by  
240 epidemiology models that the tumors induced by radiation are similar to background  
241 tumors in a population. This assumption is consistent with the multiplicative risk  
242 model, and also based on lack of information to make an alternative assumption. Using  
243 the sensitivity analysis method described earlier [7-9] suggests that increases in tumor  
244 lethality for HZE particle and neutrons compared to background or low LET tumors as  
245 suggested by animal studies could substantially increase REID and uncertainty  
246 estimates.

247

248

249 **Figure 4.** Probability distribution functions for 45-y old females in the conventional model  
250 and two predictions of the impact of increased lethality and NTEs.

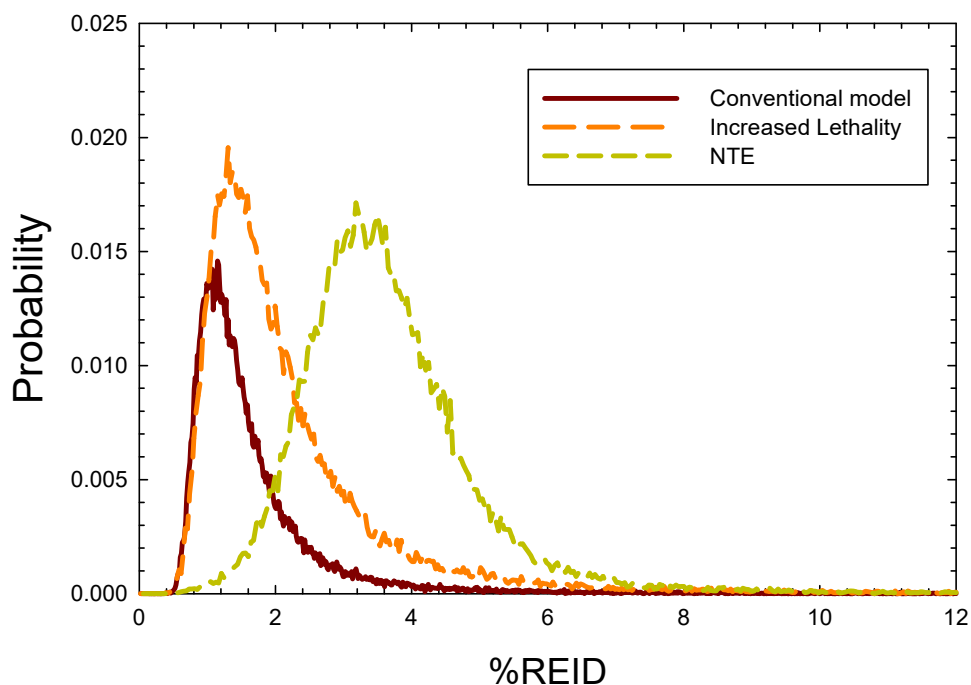

251

252 **Table 7** shows predictions for increased lethality of tumors at high LET using  
 253 the formalism described above. In **Table 8** we show predictions with NTE. Both  
 254 important high LET effects shift REID predictions dramatically to higher values. In  
 255 **Figure 4** we compare probability distributions for the different models. NTE suggest a  
 256 much higher level of concern than increased lethality. Also there is a much larger body  
 257 of evidence that NTE's will contribute to the mutation and instability at low doses of  
 258 high LET, while few studies have directly investigated tumor quality effects.

259  
 260 **Table 7.** Effect of increased tumor lethality for high LET radiation on %REID  
 261 predictions for 45-y old females for annual GCR near solar minimum.  
 262

| Increased High LET Lethality coefficient | % REID | 95% CI       |
|------------------------------------------|--------|--------------|
| 0                                        | 1.64   | [0.69, 4.35] |
| 20%                                      | 1.86   | [0.71, 5.11] |
| 40%                                      | 2.06   | [0.74, 5.89] |
| 60%                                      | 2.24   | [0.77, 6.62] |

263  
 264 **Table 8.** Predictions of 45-y old females %REID predictions for average GCR  
 265 conditions with addition of non-targeted effects.  
 266

| $A_{\text{bys.}} \mu\text{m}^2$ | % REID | 95% CI       |
|---------------------------------|--------|--------------|
| 0                               | 1.64   | [0.69, 4.35] |
| 1000                            | 3.67   | [1.68, 6.82] |
| 2000                            | 5.83   | [2.56, 9.7]  |
| 5000                            | 12.2   | [5.1, 19.0]  |

267  
 268  
 269 **4. Conclusions**

270  
 271 Past NAS [54] and NCRP [1-3] reports were highly influential in stressing the  
 272 importance of understanding the radiobiology of heavy ion and other high LET  
 273 radiation, while not blindly assuming GCR risks are easily projected from low LET  
 274 observations of risk. In-fact NCRP Reports No 98 and No 132 were intended only for  
 275 low Earth orbit. NCRP Report 132 relied on the uncertainty assessment in NCRP  
 276 Report 126 [2,3]. This report used largely subjective methods to estimate uncertainties  
 277 in low LET radiation epidemiology including uncertainties in data collection, bias,  
 278 errors in organ dose assessments of the atomic bomb exposures, future projections of  
 279 immature data sets and statistical uncertainties. Larger uncertainties were estimated for  
 280 estimating dose-rate effects for low dose and dose-rate exposures and transfer models  
 281 that chose between EAR versus ERR. Since that time low LET radiation epidemiology  
 282 data has matured to a great extent, while only modest uncertainties are estimated for  
 283 total solid cancer and leukemia risks.

284 The concordance in excess relative risks per Gy found between the LSS study  
 285 and INWORKS suggest an agreement of about a factor of 2, however there are many

286 differences in the makeup and maturity of the studies. The lack of an age and latency  
287 parameterization in INWORKS is a limitation in comparisons that use applications of  
288 these results. For tissue specific cancer risks larger differences occur. For example,  
289 Preston et al. [20] find many specific tissues have significant increases attributed to  
290 radiation exposure, while Richardson et al. [17] find non-significant results for many  
291 of the same tissues including colon, brain, liver, and bladder which makeup important  
292 contribution in the LSS study. The reason unknown but could be due to the lower doses  
293 in the INWORKS cohorts or differences in genetic or host environmental factors. In  
294 this report we considered only total solid cancer and leukemias excluding CLL. The  
295 treatment of tissue specific risks and update on background rates for never-smokers  
296 will be considered in a future report.

297 High LET related uncertainties in QF parameters, NTEs and tumor lethality  
298 were shown to dominate uncertainties. Track segment irradiation studies with heavy  
299 ions are need to reduce uncertainties in QF parameters. The dichotomy in the  $\kappa$  for light  
300 and heavy ions is likely due to the higher effectiveness of lower energy  $\delta$ -rays (<5 keV),  
301 which has a larger impact of light ions. This effect will be addressed in future version  
302 of NSCR. Several recent reviews have noted the importance of NTE's for high LET  
303 radiation and the supra-linear dose responses produced by NTE's at low dose can  
304 substantially increase RBE estimates and skew PDFs for cancer risk estimates. Similar  
305 reports [32-42] have suggested that HZE particles and neutrons could produce more  
306 lethal tumors compared to tumors produced by low LET radiation or background  
307 tumors, which is a qualitative difference not accounted for in current risk estimates. For  
308 low LET radiation there is an implicit assumption made by epidemiology models that  
309 the tumors induced by radiation are similar to background tumors in a population. This  
310 assumption is consistent with the multiplicative risk model, and also based on lack of  
311 information to make an alternative assumption. The potential role for NTEs is the  
312 largest uncertainty found in this study. NTEs are supported by many mechanistic  
313 studies, however are sparse for dose response modeling. Studies are needed over the  
314 low dose range (0.001 to 0.05 Gy) in mouse or other small animals. Also, the use of  
315 high Z ions such as Nb, La, Au or Pb with ranges of a few cm or more in tissue are  
316 recommended because here directly traversed target cells have a high probability of cell  
317 kill. Therefore, tumors observed would likely directly NTEs.

318

319

## 320 **References**

- 321 1. NCRP. Guidance on radiation received in space activities. National Council on  
322 Radiation Protection and Measurements. NCRP Rep. 98: Bethesda, MD; 1989.
- 323 2. NCRP. Recommendations of dose limits for low earth orbit. National Council on  
324 Radiation Protection and Measurements. NCRP Report 132: Bethesda MD; 2000.
- 325 3. NCRP, Uncertainties in fatal cancer risk estimates used in radiation protection.  
326 National Council on Radiation Protection and Measurements Report 126:  
327 Bethesda MD; 1997.

- 328 4. Cucinotta FA, Schimmerling W, Wilson JW, Badhwar GD, Peterson LE, Saganti  
329 P, Dicello JF. Space radiation cancer risks and uncertainties for Mars missions.  
330 *Radiat Res.* 2001;156: 682-688.
- 331 5. Cucinotta FA, Kim MY, Ren L. Evaluating shielding effectiveness for reducing  
332 space radiation cancer risks. *Radiat Meas.* 2006; 41:173-185.
- 333 6. Cucinotta FA, Kim MY, Chappell L. Space radiation cancer risk projections and  
334 uncertainties- 2012. NASA TP 2013-217375; 2013.
- 335 7. Cucinotta FA. Space radiation risks for astronauts on multiple International Space  
336 Station missions. *PLoS One* 2014;9(4): e96099.
- 337 8. Cucinotta FA. A New approach to reduce uncertainties in space radiation cancer  
338 risk predictions. *PLoS One* 2015; 10(3): e0120717.
- 339 9. Cucinotta FA, To K, Cacao E. Predictions of Space Radiation Fatality Risk for  
340 Exploration Missions. *Life Sci Space Res.* 2017; 13, 1-11.
- 341 10. NRC. Technical evaluation of the NASA model for cancer risk to astronauts due  
342 to space radiation. National Research Council. The National Academies Press:  
343 Washington DC; 2012.
- 344 11. NCRP. Radiation protection for space activities: supplement to previous  
345 recommendations. National Council on Radiation Protection and Measurements  
346 Commentary 23: Bethesda MD; 2014.
- 347 12. Cucinotta, F.A., Alp, M., Rowedder B., Kim, M.Y.: Safe days in space with  
348 acceptable uncertainty from space radiation exposure. *Life Sci Space Res.* 2015;  
349 2: 54-69.
- 350 13. Cacao, E., Hada, M., Saganti, P.B., George, K.A., Cucinotta, F.A.: Relative  
351 biological effectiveness of HZE particles for chromosomal aberrations and other  
352 surrogate cancer risk endpoints. *PLoS One* 2016; 11(4): e0153998.
- 353 14. Grant EJ, Brenner A, Sugiyama H, Sakata R, Sakadane A, et al. Solid cancer  
354 incidence among the Life-span study of atomic-bomb survivors: 1958-2009.  
355 *Radiat Res.* 2017; 187: 513-537.
- 356 15. Leuraud, K, Richardson DB, Cardis E, Daniels RD, Gillies M, et al. Ionising  
357 radiation and risk of death from leukemia and lymphoma in radiation-monitored  
358 workers (INWORKS): an international cohort study. *Lancet Haematology* 2015;  
359 2, e276.
- 360 16. Richardson DB, Cardis E, Daniels RD, Gillies M, O'Hagan JA, et al., Risk of  
361 cancer from occupational exposure to ionizing radiation: retrospective cohort  
362 study of workers in Frances, the United Kingdom, and the United States  
363 (INWORKS). *Brit Med J.* 2015; 351: h5359.
- 364 17. Richardson DB, Cardis E, Daniels RD, Gillies M, Haylock R, et al. Site-specific  
365 solid cancer mortality after exposure to ionizing radiation. *Epidemiology* 2018;  
366 29: 31-40.

- 367 18. Preston DL, Ron E, Tokuoka S, Nishi N, Soda M, et al. Solid cancer incidence in  
368 atomic bomb survivors: 1958-1998. *Radiat Res.* 2007; 168: 1-64.
- 369 19. United Nations Scientific Committee on the Effects of Atomic Radiation. Sources  
370 and effects of ionizing radiation UNSCEAR 2006 report to the general assembly,  
371 with Scientific Annexes. New York: United Nations; 2008.
- 372 20. BEIR VII. Health risks from exposure to low levels of ionizing radiation. National  
373 Academy of Sciences Committee on the Biological Effects of Radiation.  
374 Washington DC: National Academy of Sciences Press; 2006.
- 375 21. National Vital Statistics Reports: United States Lifetables, 2017. Center for  
376 Disease Control, 2019; 68(7).
- 377 22. Surveillance, Epidemiology, and End Results (SEER) Program  
378 ([www.seer.cancer.gov](http://www.seer.cancer.gov)) SEER\*Stat Database: Incidence - SEER Research Data, 9  
379 Registries, Nov 2019 Sub (1975-2017) - Linked To County Attributes - Time  
380 Dependent (1990-2017) Income/Rurality, 1969-2017 Counties, National Cancer  
381 Institute, DCCPS, Surveillance Research Program, released April 2020, based on  
382 the November 2019 submission.
- 383 23. Cucinotta FA, Cacao E, Alp M. Space radiation quality factors and the delta-ray  
384 dose and dose-rate effectiveness factor. *Health Phys.* 2016; 110: 262-266.
- 385 24. Cucinotta FA, Cacao E. Non-targeted effects models predict significantly higher  
386 mars mission cancer risk than targeted effects model. *Scientific Rep.* 2017; 7:  
387 1832.
- 388 25. Hoel DG. Comments on the DDREF estimate of the BEIR VII committee. *Health  
389 Phys.* 25; 108: 351-356.
- 390 26. Chang PY, Cucinotta FA, Bjornstad KA, Bakke J, Rosen CJ, Du N, Fairchild DG,  
391 Cacao E, Blakely EA. Harderian gland tumorigenesis: Low-dose and LET  
392 response. *Radiat Res.* 2016; 185, 449 – 460.
- 393 27. Fry RJM, Garcia AG, Allen KH, Sallèse A, Tahmisian TN, Lombard LS,  
394 Ainsworth EJ. The effects of pituitary isografts on radiation carcinogenesis in the  
395 mammary and Harderian glands of mice. In *Biological Effects of Low Level  
396 Radiation Pertinent to Protection of Man and His Environment.* Vol 1. 1976; 213-  
397 227.
- 398 28. Fry RJM, Powers-Risius P, Alpen EL, Ainsworth EJ. High LET radiation  
399 carcinogenesis. *Radiat Res.* 1985; 104: S188-S195.
- 400 29. Alpen EL, Powers-Risius P, Curtis SB, DeGuzman R. Tumorigenic potential of  
401 high-Z, high-LET charged particle radiations. *Radiat Res.* 1993; 88:132-143.
- 402 30. Kadhim M, Salomaa S, Wright E, Hildenbrandt G, Belyakov OV, Prise KM, et al.  
403 Non-targeted effects of ionizing radiation- implications for low dose risk. *Mutat  
404 Res.* 2013; 752: 84-98.
- 405 31. Illa-Bochaca I, Ouyang H, Tang J, Sebastiano C, Mao JH, Costes SV, et al..  
406 Densely ionizing radiation acts via the microenvironment to promote aggressive  
407 Trp53 null mammary carcinomas. *Cancer Res.* 2014; 74, 7137-7148.



- 408 32. Morgan, W. F. Non-targeted and delayed effects of exposure to ionizing radiation.  
409 I. Radiation-induced genomic instability and bystander effects in vitro. *Radiat*  
410 *Res.* 2003; 159, 567–580.
- 411 33. Maxwell, C. A. et al. Targeted and nontargeted effects of ionizing radiation that  
412 impact genomic instability. *Cancer Res.* 2008; 68, 8304–8311.
- 413 34. Lorimore SA, Coates PJ, Wright EG, Radiation-induced genomic instability and  
414 bystander effects: inter-related nontargeted effects of exposure to ionizing  
415 radiation. *Oncogene* 22, 7058–7069; 2003.
- 416 35. Belyakov, O. V. et al. Biological effects in unirradiated human tissue induced by  
417 radiation damage up to 1 mm away. *Proc National Acad Sci USA.* 2005; 102:  
418 14203–14208.
- 419 36. Gailard S, et al. Propagation distance of the alpha-particle induced bystander  
420 effect: the role of nuclear traversal and gap junction communication. *Radiat Res*  
421 2009; 171, 513–520.
- 422 37. Nagasawa H, et al. Role of homologous recombination in the alpha-particle-  
423 induced bystander effect for sister chromatid exchanges and chromosomal  
424 aberrations. *Radiat Res.* 2005; 164, 141–147.
- 425 38. Jain MR, Li M, Chen W, Liu T, de Toledo SM, Pandey BN, Li H, Rabin BM,  
426 Azzam EI. In Vivo space radiation-induced non-targeted responses: late effects on  
427 molecular signaling in mitochondria. *Curr Mol Pharmacol.* 2011; 106-114.
- 428 39. Hada M, Chappell, LJ, Wang M, George KA, Cucinotta FA. On the induction of  
429 chromosomal aberrations at fluence of less than one HZE particle per cell nucleus.  
430 *Radiat Res.* 2014; 182, 368–379.
- 431 40. Bettega D, Calzolari P, NorisChiorda G, Tallone-Lombardi. Transformation of  
432 C3H10T1/2 cells with 4.3 MeV  $\alpha$  particles at low doses: effects of single and  
433 fractionated doses. *Radiat Res* 1992; 131: 66-71.
- 434 41. Li Y, Wang M, Carra C, Cucinotta FA. Modularized Smad-regulated TGF $\beta$   
435 Signaling Pathway. *Mathematical Biosci.* 2012; 240: 187-200.
- 436 42. Wilson JW, Townsend LW, Shinn JL, Cucinotta FA, Costen RC, Badavi FF,  
437 Lamkin SL. Galactic cosmic ray transport methods: Past, present, and future. *Adv.*  
438 *Space Res.* 1994;14: 841–852.
- 439 43. Cucinotta FA, Kim MY, Schneider I, Hassler DM. Description of light ion  
440 production cross sections and fluxes on the Mars surface using the QMSFRG  
441 model. *Radiat Environ Biophys.* 2007; 46:101–106.
- 442 44. Zeitlin, C. et al. Measurements of the energetic particle radiation environment in  
443 transit to Mars on the Mars Science laboratory. *Science* 2013; 340: 1080–1084.
- 444 45. Kim MY, Cucinotta FA, Nounu H, Zeitlin C, Hassler DM, Rafkin SCR, et al.  
445 Comparison of Martian surface ionizing radiation measurements from MSL-RAD  
446 with Badhwar-O’Neill 2011/HZETRN model calculations. *J Geophys Res.* 2014;  
447 On-line First. DOI: 10.1002/2013JE004549.

- 448 46. ICRP. International Commission on Radiological Protection. Assessment of  
449 radiation exposure of astronauts in space. Thousand Oaks, CA: Sage Publications;  
450 ICRP Publication 123, Ann. ICRP 42(4); 2013.
- 451 47. Dicello JF, Christian A, Cucinotta FA, Gridley DS, Kathirithamby R, Mann J, et  
452 al. *In vivo* mammary tumorigenesis in the Sprague-Dawley rat and  
453 microdosimetric correlates. *Phys Med Biol.* 2004; 49: 3817-3830.
- 454 48. Weil MM, Ray FA, Genik PC, Yu Y, McCarthy M, Fallgren CM, et al. Effects of  
455  $^{28}\text{Si}$  ions,  $^{56}\text{Fe}$  ions, and protons on the induction of murine acute myeloid  
456 leukemia and hepatocellular carcinoma. *PLoS One.* 2014;9(8): e104819.
- 457 49. Grahn D, Lombard LS, Carnes BA. The comparative tumorigenic effects of  
458 fission neutrons and Cobalt-60  $\gamma$  rays in B6CF<sub>1</sub> mouse. *Radiat Res.* 1992;129:19-  
459 36.
- 460 50. Imaoka T, Nishimura, Kakinuma S, Hatano Y, Ohmachi Y, Yoshinaga S, et al.  
461 High relative biological effectiveness of carbon ion irradiation on induction of rat  
462 mammary carcinoma and its lack of H-ras and Tp53 mutations. *Int J Radiat Oncol*  
463 *Biophys.* 2007;69: 194-203.
- 464 51. Trani D, Datta K, Doiron K, Kallakury B, Fornace Jr AJ. Enhanced intestinal  
465 tumor multiplicity and grade *in vivo* after HZE exposure: mouse models for space  
466 radiation risk estimates. *Radiat Environ Biophys.* 2010;49: 389-396.
- 467 52. Datta K, Suman S, Kallakury BV, Fornace Jr AJ. Heavy ion radiation exposure  
468 triggered higher intestinal tumor frequency and greater  $\beta$ -catenin activation than  $\gamma$   
469 radiation in APC<sup>Min/+</sup> mice. *PLoS ONE.* 2013;8: e59295.
- 470 53. Illa-Bochaca I, Ouyang H, Tang J, Sebastiano C, Mao JH, Costes SV, et al.  
471 Densely ionizing radiation acts via the microenvironment to promote aggressive  
472 Trp53 null mammary carcinomas. *Cancer Res.* 2014;74(23): 7137-7148.
- 473 54. Wang X, Farris AB, Wang P, Zhang X, Wang H, Wang Y. Relative Effectiveness  
474 at 1 Gy after acute and fractionated exposures of heavy ions with different linear  
475 energy transfer for lung tumorigenesis. *Radiat Res.* 2015; 18(2): 233-239.
- 476 55. NAS, National Academy of Sciences Space Science Board. Report of the task  
477 group on the biological effects of space radiation: Radiation hazards to crews on  
478 interplanetary missions. The National Academies Press: Washington DC, 1996.

479
